# Supplementary material for: Cellulose-based electrospun fibers functionalized with polypyrrole and polyaniline for fully organic batteries
Source: Royal Society of Chemistry journal article supplement (doi:10.1039/c7ta06457h), 2017-11-30
Supplement: c7ta06457h1.pdf [file c7ta06457h1.pdf]

## Supplementary Information

### Different charge/discharge rates

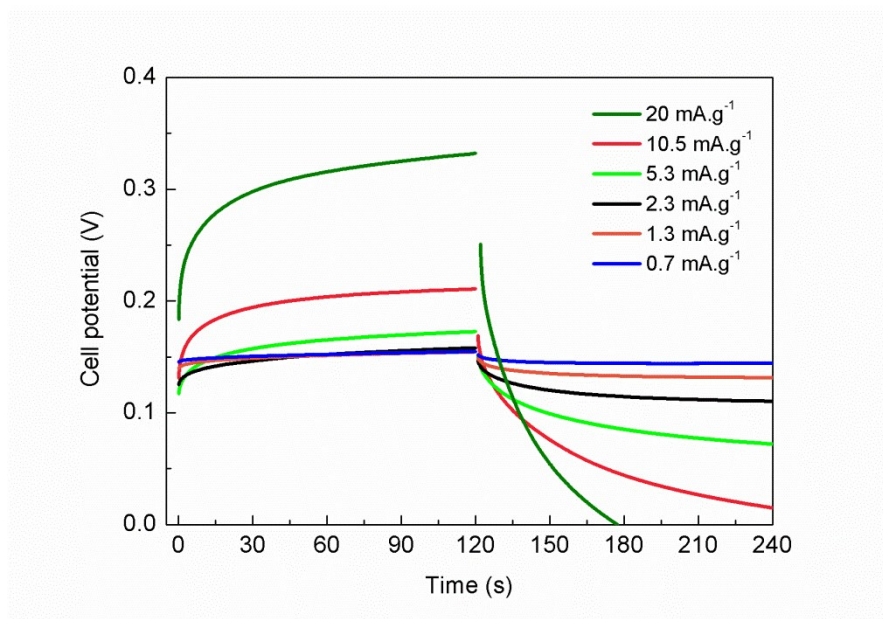

**Figure S1.** Comparison of charge/discharge curves at various fixed current densities per unit mass of 20, 10.5, 5.3, 2.3, 1.3 and 0.7 mA.g<sup>-1</sup>

## Electrochemical Setup

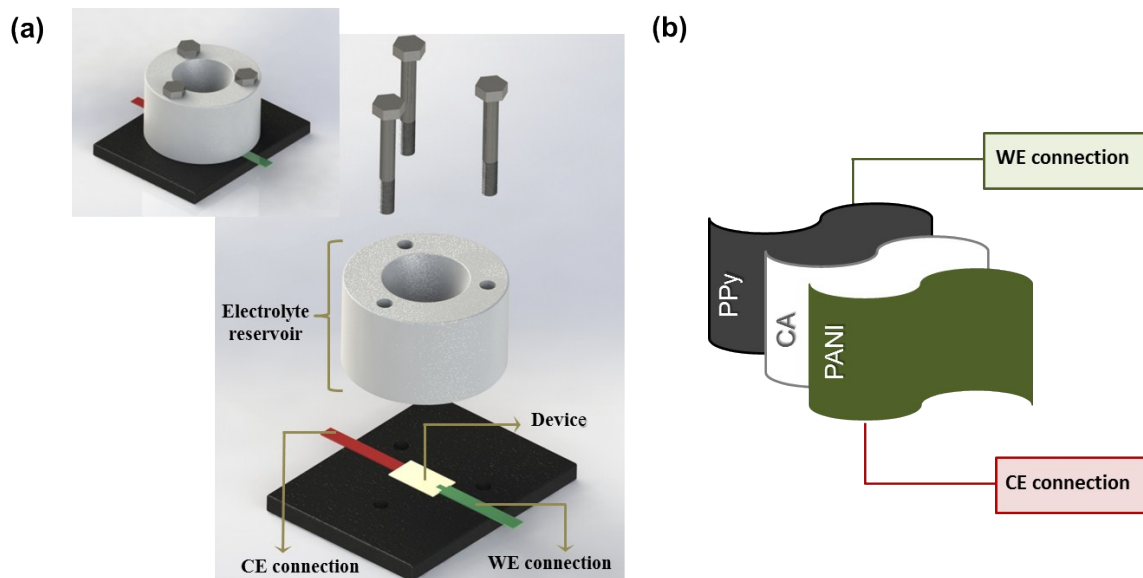

**Figure S2.** (a) Schematic of the electrochemical cell used for electrochemical characterization and charge/discharge measurements: Two flexible carbon meshes were used as the connection for the working electrode (WE) and the counter electrode (CE). This electrochemical cell has a reservoir in order to easily inject the electrolyte; (b) Device assembly used in electrochemical characterization.
